# Supplementary material for: Exploring Epigenetic Age in Response to Intensive Relaxing Training: A Pilot Study to Slow Down Biological Age
Source: PubMed Central journal article supplement (PMC6747190; doi:10.3390/ijerph16173074), 2019-08-23
Supplement: ijerph-16-03074-s001.pdf [file ijerph-16-03074-s001.pdf]

## Supplementary Material

**Table S1. Details of markers, AgePlex sequences to analyze, CpG sites and location of the prediction model.**

| <b>marker</b>   | <b>Sequence to analyze</b>                                           | <b>CpG site</b> | <b>Location (GRCh38)</b> |
|-----------------|----------------------------------------------------------------------|-----------------|--------------------------|
| <b>ELOVL2</b>   | CCRTAAACRTTAAACCRCCRCRCRAAACCRAC                                     | C7              | Chr6:<br>11044661        |
| <b>C1orf132</b> | AAATCTACRCAAACRACRATAAATAATCC                                        | C1              | Chr1:<br>207823681       |
| <b>TRIM59</b>   | GGTTTGGYGYGGGAYGAGGYGAAGYGTYYG<br>TGGTYGAYGGTTTTTGAGGAATTATTTTTTATTT | C7              | Chr3:<br>160450199       |
| <b>KLF14</b>    | TYGYGTTTTTTTTTTTGTYYGGYAGTTAGGTA<br>ATGGTAATAGAG                     | C1              | Chr7:<br>130734355       |
| <b>FHL2</b>     | AGTTATYGGGAGYGTYYGTTTTYGGYGTGGG<br>TTTTYGGGYGYGAGTTTTYGGAYGAGGTTTGGG | C2              | Chr2:<br>105399288       |

**Table S2. LTL and Telomerase expression at enrolment T0 and after 60 days of relaxing practices T1.**

|                             | T0          | T1          | <i>p</i> <sup>§</sup> |
|-----------------------------|-------------|-------------|-----------------------|
| <b>LTL mean (SD)</b>        |             |             |                       |
| <b>All subjects</b>         | 1.57 (0.38) | 1.40 (0.38) | 0.081                 |
| <b>Patients</b>             | 1.49 (0.34) | 1.25 (0.20) | <b>0.051</b>          |
| <b>Healthy subjects</b>     | 1.75 (0.43) | 1.73 (0.49) | 0.926                 |
| <b>Telomerase mean (SD)</b> |             |             |                       |
| <b>All subjects</b>         | 1.26 (0.86) | 1.16 (0.57) | 0.537                 |
| <b>Patients</b>             | 1.43 (0.89) | 1.19 (0.66) | 0.224                 |
| <b>Healthy subjects</b>     | 0.85 (0.66) | 1.09 (0.31) | 0.339                 |

<sup>§</sup>Paired t tests
